# Supplementary material
Source: publisher figshare collection journal article supplement (https://sage.figshare.com/ndownloader/files/15342341)
Supplement: Supplementary file 1 [file 15342341]

## Appendix A

| title                                                                                                                | Author                                                                                                     | journal | Year | volume |
|----------------------------------------------------------------------------------------------------------------------|------------------------------------------------------------------------------------------------------------|---------|------|--------|
| Assessing Typographic Knowledge Using Timed Tests                                                                    | Ishizaki, Suguru (M)                                                                                       | IEEE    | 2011 | 2      |
| Challenges to Project-based Computer-Assisted Language Learning (CALL) for Professional Communication in China       | Gu, Peiya (F)                                                                                              | IEEE    | 2011 | 3      |
| Assessing the Impact of Student Peer Review in Writing Instruction by Using the Normalized Compression Distance      | (1) Yoshizawa, Sayuri (F)<br>(2) Terano, Takao (M)<br>(3) Yosikawa, Atsushi (M)                            | IEEE    | 2012 | 1      |
| A Study of Engineering Students' Intercultural Competence and Its Implications for Teaching                          | Yu, Han (F)                                                                                                | IEEE    | 2012 | 2      |
| Achieving Experiential Cross-cultural Training Through a Virtual Teams Project                                       | Zemliansky, Pavel (M)                                                                                      | IEEE    | 2012 | 3      |
| Learning in Color: How Color and Affect Influence Learning Outcomes                                                  | (1) Kumi, Richard (M)<br>(2) Conway, Christopher M. (M)<br>(3) Limayem, Moez (M)<br>(4) Goyal, Sandeep (M) | IEEE    | 2013 | 1      |
| The Frequency and Function of Just in British and New Zealand Engineering Lectures                                   | Grant, Lynn (F)                                                                                            | IEEE    | 2013 | 2      |
| Functional and Nonfunctional Quality in Cloud-Based Collaborative Writing: An Empirical Investigation                | (1) Kim, Jongwoo (M)<br>(2) Mohan, Kannan (M)<br>(3) Ramesh, Balasubramaniam (M)                           | IEEE    | 2014 | 3      |
| Learning Beyond the Classroom and Textbook: Client Projects' Role in Helping Students Transition From School to Work | (1) Kramer-Simpson, Elisabeth<br>(2) Newmark, Julianne<br>(3) Ford, Julie Dyke                             | IEEE    | 2015 | 1      |
| Personas in Heuristic Evaluation: An Exploratory Study                                                               | Friess, Erin                                                                                               | IEEE    | 2015 | 2      |

|                                                                                                                                                       |                                                                                                                                         |      |      |   |
|-------------------------------------------------------------------------------------------------------------------------------------------------------|-----------------------------------------------------------------------------------------------------------------------------------------|------|------|---|
| Instructional Design for Stem-Based Collaborative, Colocated Classroom Composition                                                                    | (1) Mehlenbacher, Brad<br>(2) Autry, Meagan Kittle<br>(3) Kelly, Ashley Rose                                                            | IEEE | 2015 | 4 |
| I Really Don't Know What He Meant by That': How Well Do Engineering Students Understand Teachers' Comments on Their Writing?                          | Taylor, Summer Smith                                                                                                                    | TCQ  | 2011 | 2 |
| Connecting with the 'Other' in Technical Communication: World Englishes and Ethos Transformation of U.S. Native English-Speaking Students.            | Jarvis Kwadzo Bokor, Michael                                                                                                            | TCQ  | 2011 | 2 |
| Sharing an Assessment Ecology: Digital Media, Wikis, and the Social Work of Knowledge.                                                                | (1) Manion, Christopher E.<br>(2) Selfe, Richard "Dickie"                                                                               | TCQ  | 2012 | 1 |
| Process, Product, and Potential: The Archaeological Assessment of Collaborative, Wiki-Based Student Projects in the Technical Communication Classroom | (1) Barton, Matthew D.<br>(2) Heiman, James R.                                                                                          | TCQ  | 2012 | 1 |
| Assessing Scholarly Multimedia: A Rhetorical Genre Studies Approach                                                                                   | Ball, Cheryl E.                                                                                                                         | TCQ  | 2012 | 1 |
| Intercultural Competence in Technical Communication: A Working Definition and Review of Assessment Methods                                            | Yu, Han (F)                                                                                                                             | TCQ  | 2012 | 2 |
| Managing Complexity: A Technical Communication Translation Case Study in Multilateral International Collaboration                                     | (1) Maylath, Bruce<br>(2) Vandepitte, Sonia<br>(3) Minacori, Patricia<br>(4) Isohella, Suvi<br>(5) Moustén, Birthe<br>(6) Humbley, John | TCQ  | 2013 | 1 |

|                                                                                                                              |                                                                |     |      |   |
|------------------------------------------------------------------------------------------------------------------------------|----------------------------------------------------------------|-----|------|---|
| Examining the Effect of Reflective Assessment on the Quality of Visual Design Assignments in the Technical Writing Classroom | Lauer, Claire                                                  | TCQ | 2013 | 2 |
| Lessons in Service Learning: Developing the Service Learning Opportunities in Technical Communication (SLOT-C) Database      | (1) Youngblood, Susan A.<br>(2) Mackiewicz, Jo                 | TCQ | 2013 | 3 |
| The Rhetoric of Free: Open Source Software and Technical Communication During Economic Downturns                             | Zoetewey, Meredith W.                                          | TCQ | 2013 | 4 |
| Tweeting an Ethos: Emergency Messaging, Social Media, and Teaching Technical Communication                                   | Bowdon, Melody A.                                              | TCQ | 2014 | 1 |
| The Rhetoric of Reach: Preparing Students for Technical Communication in the Age of Social Media                             | (1) Verzosa Hurley, Elise<br>(2) Kimme Hea, Amy C.             | TCQ | 2014 | 1 |
| The Naked Truth about the Naked This : Investigating Grammatical Prescriptivism in Technical Communication                   | (1) Boettger, Ryan K.<br>(2) Wulff, Stefanie                   | TCQ | 2014 | 2 |
| Adapting Service-Learning into the Online Technical Communication Classroom: A Framework and Mode                            | Bourelle, Tiffany                                              | TCQ | 2014 | 4 |
| Professional and Technical Communication in a Web 2.0 World                                                                  | (1) Blythe, Stuart<br>(2) Lauer, Claire<br>(3) Curran, Paul G. | TCQ | 2014 | 4 |
| A Case for Metic Intelligence in Technical and Professional Communication Programs                                           | Pope-Ruark, Rebecca                                            | TCQ | 2014 | 4 |

|                                                                                                                             |                                                                       |     |      |          |
|-----------------------------------------------------------------------------------------------------------------------------|-----------------------------------------------------------------------|-----|------|----------|
| Creativity Counts: Why Study Abroad Matters to Technical and Professional Communication                                     | Ballentine, Brian D.                                                  | TCQ | 2015 | <u>4</u> |
| Multimodality in the Technical Communication Classroom: Viewing Classical Rhetoric Through a 21st Century Lens.             | (1) Bouelle, Andrew<br>(2) Bouelle, Tiffany<br>(3) Jones, Natasha     | TCQ | 2015 | 4        |
| An Analysis of Student Comments in Comprehensive Editing                                                                    | (1) Albers, Michael J.<br>(2) Marsella, John F.                       | TC  | 2011 | 1        |
| Current Overview of Academic Certificates in Technical and Professional Communication in the United States                  | Meloncon, Lisa                                                        | TC  | 2012 | 3        |
| An Academic Ejournal As Technical Communication Client Project: Enculturation, Production, and Assessment                   | (1) Newmark, Julianne<br>(2) Ford, Julie Dyke                         | TC  | 2012 | 4        |
| Current State of U.S. Undergraduate Degree Programs in Technical and Professional Communication                             | (1) Meloncon, Lisa<br>(2) Henschel, Sally                             | TC  | 2013 | 1        |
| The Minimalist Approach to Online Instructional Videos                                                                      | Pflugfelder, Ehren Helmut (M)                                         | TC  | 2013 | 2        |
| Designing and Implementing a Low-Cost Usability Testing Laboratory: Theoretical Justifications and Practical Considerations | Garrison, Kevin                                                       | TC  | 2013 | <u>3</u> |
| Networked Rhetoric: iFixit and the Social Impact of Knowledge Work                                                          | (1) Getto, Guiseppe<br>(2) Franklin, Nathan<br>(3) Ruskiewicz, Sheryl | TC  | 2014 | <u>3</u> |

|                                                                                                          |                                                                       |      |      |   |
|----------------------------------------------------------------------------------------------------------|-----------------------------------------------------------------------|------|------|---|
| Technically Speaking: Preservice Teachers' Perspectives and Attitudes on the Use of Technology           | (1) Magolis, David<br>(2) Homishak, Michael                           | TC   | 2014 | 4 |
| A Constructionist English Language Teaching Project Based on an Aeronautical Conceptual Design Challenge | Tatzl, Dietmar (M)                                                    | TC   | 2015 | 1 |
| Integrating Technical Communication Into China's English Major Curriculum                                | Yu, Han (F)                                                           | JBTC | 2011 | 1 |
| Teaching the IMRaD Genre: Sentence Combining and Pattern Practice Revisited                              | (1) Wolfe, J.<br>(2) Britt, C.<br>(3) Poe Alexander, K.               | JBTC | 2011 | 2 |
| Visuospatial Thinking in the Professional Writing Classroom                                              | (1) Lauer, C.<br>(2) Sanchez, C. A.                                   | JBTC | 2011 | 2 |
| Using Key Messages to Explore Rhetoric in Professional Writing                                           | Shaver, L.                                                            | JBTC | 2011 | 2 |
| Bringing Social Media to the Writing Classroom: Classroom Salon                                          | (1) Kaufer, D.<br>(2) Gunawardena, A.<br>(3) Tan, A.<br>(4) Cheek, A. | JBTC | 2011 | 3 |
| Transfer, Transformation, and Rhetorical Knowledge: Insights From Transfer Theory                        | Brent, D.                                                             | JBTC | 2011 | 4 |
| After the Great War: Utility, Humanities, and Tracings From a Technical Writing Class in the 1920s       | Sullivan, Patricia                                                    | JBTC | 2012 | 2 |
| Relying on Writing Consultants: The Design of a WID Program for a College of Business                    | Mackiewicz, Jo                                                        | JBTC | 2012 | 2 |
| Race, Rhetoric, and Technology: A Case Study of Decolonial Technical                                     | Haas, Angela M.                                                       | JBTC | 2012 | 3 |

|                                                                                                                                                     |                                                                              |      |      |   |
|-----------------------------------------------------------------------------------------------------------------------------------------------------|------------------------------------------------------------------------------|------|------|---|
| Communication Theory, Methodology, and Pedagogy                                                                                                     |                                                                              |      |      |   |
| Cracking the Case:A Task-Based Investigation of a Group Case-Study Project at a Business School                                                     | (1) Thondhlana, Juliet<br>(2) Smith, Ann F. V.                               | JBTC | 2013 | 1 |
| Creating Professional ePortfolios in Technical Writing                                                                                              | Bacabac, Florence Elizabeth                                                  | JBTC | 2013 | 1 |
| The Efficacy of Text Messaging to Improve Social Connectedness and Team Attitude in Student Technical Communication Projects: An Experimental Study | Lam, Chis                                                                    | JBTC | 2013 | 2 |
| Communicating Web Accessibility to the Novice Developer: From User Experience to Application                                                        | Youngblood, Susan A.                                                         | JBTC | 2013 | 2 |
| iPads in the Technical Communication Classroom: An Empirical Study of Technology Integration and Use                                                | (1) Faris, Michael J.<br>(2) Selber, Stuart A.                               | JBTC | 2013 | 4 |
| Framing Sustainability: Business Students Writing About the Environment                                                                             | (1) Mathison, Maureen A.<br>(2) Stillman-Webb, Natalie<br>(3) Bell, Sarah A. | JBTC | 2014 | 1 |
| Communication Instruction in Landscape Architecture Courses: A Model and Effects on Students' Self-Efficacy                                         | Housley Gaffney, Amy L.                                                      | JBTC | 2014 | 2 |
| Paying Attention to Accessibility When Designing Online Courses in Technical and Professional Communication                                         | (1) Oswal, Sushil K.<br>(2) Meloncon, Lisa                                   | JBTC | 2014 | 3 |
| Locating the Semiotic Power of Writing in Science                                                                                                   | Wickman, Chad                                                                | JBTC | 2015 | 1 |
| Academic Territorial Borders: A Look at the Writing Ethos in Business Courses in                                                                    | (1) Annous, Samer<br>(2) Nicolas, Maureen O'Day                              | JBTC | 2015 | 1 |

|                                                                                                                                                                           |                                                           |      |      |   |
|---------------------------------------------------------------------------------------------------------------------------------------------------------------------------|-----------------------------------------------------------|------|------|---|
| an Environment in Which English Is a Foreign Language                                                                                                                     |                                                           |      |      |   |
| Introducing Agile Project Management Strategies in Technical and Professional Communication Courses                                                                       | Pope-Ruark, Rebecca                                       | JBTC | 2015 | 1 |
| Teaching Students to Focus on the Data in Data Visualization                                                                                                              | Wolfe, Joanna                                             | JBTC | 2015 | 3 |
| High-Tech Invention: Examining the Relationship Between Technology and Idea Generation in the Document Design Process                                                     | Lauer, Claire                                             | JBTC | 2015 | 4 |
| Linking Contextual Factors with Rhetorical Pattern Shift: Direct and Indirect Strategies Recommended in English Business Communication Textbooks in China                 | (1) Wang, Junhua<br>(2) Zhu, Pinfan                       | JTWC | 2011 | 1 |
| Moving International Technical Communication Forward: A World Englishes Approach                                                                                          | Bokor, Michael Jarvis Kwadzo                              | JTWC | 2011 | 2 |
| Meeting Students Where They Are: Advancing a Theory and Practice of Archives in the Classroom                                                                             | (1) Saidy, Christina<br>(2) Hannah, Mark<br>(3) Sura, Tom | JTWC | 2011 | 2 |
| Practicing "Safe" Technical Communication                                                                                                                                 | Dombrowski, Paul M.                                       | JTWC | 2011 | 3 |
| Emphasizing Research (Further) in Undergraduate Technical Communication Curricula: Involving Undergraduate Students with an Academic Journal's Publication and Management | (1) Dyke Ford, Julie<br>(2) Newmark, Julianna             | JTWC | 2011 | 3 |

|                                                                                                                                                     |                                                                                         |      |      |   |
|-----------------------------------------------------------------------------------------------------------------------------------------------------|-----------------------------------------------------------------------------------------|------|------|---|
| Autobiographical Writing in the Technical Writing Course                                                                                            | Gellis, Mark                                                                            | JTWC | 2011 | 3 |
| Open Source Communities in Technical Writing: Local Exigence, Global Extensibility                                                                  | (1) Conner, Trey<br>(2) Gresham, Morgan<br>(3) McCracken, Jill                          | JTWC | 2011 | 4 |
| Challenges and Rewards of Teaching Intercultural Communication in a Technical Writing Course: A Case Study                                          | Cárdenas, Diana L.                                                                      | JTWC | 2012 | 2 |
| Bridging the Gap between the Technical Communication Classroom and the Internship: Teaching Social Consciousness and Real-World Writing             | Bourelle, Tiffany                                                                       | JTWC | 2012 | 2 |
| The Development of a Project-Based Collaborative Technical Writing Model Founded on Learner Feedback in a Tertiary Aeronautical Engineering Program | (1) Tatzl, Dietmar<br>(2) Hassler, Wolfgang<br>(3) Messnarz, Bernd<br>(4) Flühr, Holger | JTWC | 2012 | 3 |
| Preparing Technical Communication Students to Function as User Advocates in a Self-Service Society                                                  | (1) Cleary, Yvonne<br>(2) Flammia, Madelyn                                              | JTWC | 2012 | 3 |
| Exposing Hidden Relations: Storytelling, Pedagogy, and the Study of Policy                                                                          | Moore, Kristen                                                                          | JTWC | 2013 | 1 |
| A "Virtual Fieldtrip": Service Learning in Distance Education Technical Writing Courses                                                             | (1) Soria, Krista M.<br>(2) Weiner, Brad                                                | JTWC | 2013 | 2 |
| Moving towards Ethnorelativism: A Framework for Measuring and Meeting Students' Needs in Cross-Cultural Business and Technical Communication        | Wang, Junhua                                                                            | JTWC | 2013 | 2 |
| Time Talk: On Small Changes That Enact Infrastructural Mentoring for                                                                                | (1) Sullivan, Patricia<br>(2) Moore, Kristen                                            | JTWC | 2013 | 3 |



|                                                                                                      |                                      |      |      |   |
|------------------------------------------------------------------------------------------------------|--------------------------------------|------|------|---|
| Undergraduate Women in Technical Fields                                                              |                                      |      |      |   |
| Improving Scientific Voice in the Science Communication Center at UT Knoxville                       | Hirst, Russel                        | JTWC | 2013 | 4 |
| New Perspectives on the Technical Communication Internship: Professionalism in the Workplace         | Bourelle, Tiffany                    | JTWC | 2014 | 2 |
| Engineering and Narrative: Literary Prerequisites as Indirect Communication for Technical Writing    | Jeyaraj, Joseph                      | JTWC | 2014 | 2 |
| Using Isocrates to Teach Technical Communication and Civic Engagement                                | Brizzee, Allen                       | JTWC | 2015 | 2 |
| The Evil in Technical Communication: Katz, Ward, Moore, and Overnaming                               | Boedy, Matthew                       | JTWC | 2015 | 3 |
| Theorycrafting the Classroom: Constructing the Introductory Technical Communication Course as a Game | Finseth, Carly                       | JTWC | 2015 | 3 |
| Quad Charts in the Classroom to Reinforce Technical Communication Fundamentals                       | (1) Dyke Ford, Julie<br>(2) Wei, Tie | JTWC | 2015 | 3 |
